# Supplementary material for: Gold nanoparticle-enhanced X-ray microtomography of the rodent reveals region-specific cerebrospinal fluid circulation in the brain
Source: PubMed Central journal article supplement (PMC9883388; doi:10.1038/s41467-023-36083-1), 2023-01-27
Supplement: 41467_2023_36083_MOESM3_ESM.pdf [file 41467_2023_36083_MOESM3_ESM.pdf]

## Reporting Summary

Nature Portfolio wishes to improve the reproducibility of the work that we publish. This form provides structure for consistency and transparency in reporting. For further information on Nature Portfolio policies, see our [Editorial Policies](#) and the [Editorial Policy Checklist](#).

### Statistics

For all statistical analyses, confirm that the following items are present in the figure legend, table legend, main text, or Methods section.

n/a Confirmed

- The exact sample size ( $n$ ) for each experimental group/condition, given as a discrete number and unit of measurement
- A statement on whether measurements were taken from distinct samples or whether the same sample was measured repeatedly
- The statistical test(s) used AND whether they are one- or two-sided  
*Only common tests should be described solely by name; describe more complex techniques in the Methods section.*
- A description of all covariates tested
- A description of any assumptions or corrections, such as tests of normality and adjustment for multiple comparisons
- A full description of the statistical parameters including central tendency (e.g. means) or other basic estimates (e.g. regression coefficient) AND variation (e.g. standard deviation) or associated estimates of uncertainty (e.g. confidence intervals)
- For null hypothesis testing, the test statistic (e.g.  $F$ ,  $t$ ,  $r$ ) with confidence intervals, effect sizes, degrees of freedom and  $P$  value noted  
*Give  $P$  values as exact values whenever suitable.*
- For Bayesian analysis, information on the choice of priors and Markov chain Monte Carlo settings
- For hierarchical and complex designs, identification of the appropriate level for tests and full reporting of outcomes
- Estimates of effect sizes (e.g. Cohen's  $d$ , Pearson's  $r$ ), indicating how they were calculated

*Our web collection on [statistics for biologists](#) contains articles on many of the points above.*

### Software and code

Policy information about [availability of computer code](#)

Data collection

The following microscopes/imaging devices/software were used to collect the data in this study:

- Zeiss Xradia Versa 520 X-ray microscope
- Zeiss 880 Two-Photon microscope (inverted) with 488 and 561 laser lines and 20x (dry), 40x (oil immersion), and 63x (oil immersion) lenses.
- Bruker 9.4-T (400-MHz), 20-cm clear bore MRI scanner with a mouse brain CryoProbe
- Union BioMetrica VAST BioImager Platform
- Zeiss XM3DViewer 1.2.8
- Dragonfly 2020.1
- Paravision 360 3.2

## Data analysis

The following softwares were used to analyze the data in this study:

- FIJI image processing software (NIH) version 2.3.0/1.53q
- ITK-SNAP 4.0.0 beta
- GraphPad Prism v9.0.0
- Microsoft Office Excel Version 16.36
- Connectome Workbench v1.5.0
- 4dfp tools (<http://4dfp.readthedocs.io>)
- mapZebbrain zebrafish atlas (<https://mapzebrain.org/atlas/2d>)
- Custom code used for registration and skull stripping is available in the Supplementary Information

For manuscripts utilizing custom algorithms or software that are central to the research but not yet described in published literature, software must be made available to editors and reviewers. We strongly encourage code deposition in a community repository (e.g. GitHub). See the Nature Portfolio [guidelines for submitting code & software](#) for further information.

## Data

Policy information about [availability of data](#)

All manuscripts must include a [data availability statement](#). This statement should provide the following information, where applicable:

- Accession codes, unique identifiers, or web links for publicly available datasets
- A description of any restrictions on data availability
- For clinical datasets or third party data, please ensure that the statement adheres to our [policy](#)

The datasets generated and/or analyzed during the current study are available in the Supplementary Data 1 file linked in the Supplementary Information section. XRM and MRI images are not publicly available due to their size, but are available from the corresponding author on reasonable request.

## Human research participants

Policy information about [studies involving human research participants and Sex and Gender in Research](#).

## Reporting on sex and gender

No human research participants were included in this study.

## Population characteristics

No human research participants were included in this study.

## Recruitment

No human research participants were included in this study.

## Ethics oversight

No human research participants were included in this study.

Note that full information on the approval of the study protocol must also be provided in the manuscript.

## Field-specific reporting

Please select the one below that is the best fit for your research. If you are not sure, read the appropriate sections before making your selection.

- Life sciences     Behavioural & social sciences     Ecological, evolutionary & environmental sciences

For a reference copy of the document with all sections, see [nature.com/documents/nr-reporting-summary-flat.pdf](https://nature.com/documents/nr-reporting-summary-flat.pdf)

## Life sciences study design

All studies must disclose on these points even when the disclosure is negative.

## Sample size

Statistical methods were not used to re-calculate or predetermine sample sizes in any experiments. Sample size was determined based on similar studies with XRM/MicroCT and is consistent with recently published studies utilizing XRM/MicroCT (Maes et al, Nature Communications, October 2022). Since this study introduced a novel use of XRM to imaging CSF pathways, we primarily aimed to show the applicability and repeatability of this technique to tracking CSF, for which we deemed  $n = 3$  for each condition was sufficient for proof-of-concept. Our findings with XRM were also confirmed with additional histological analyses.

## Data exclusions

No data were excluded from the analyses.

## Replication

To ensure reproducibility, all XRM data presented in this manuscript were repeated three times. All fluorescent tracer injections, immunofluorescence, MRI and histological experiments were repeated at least three times. All confocal and histological images presented were imaged at least three times for a single data point. Results for all technical and biological replicates were consistent among their groups. The exact number of replications of each experiment is stated in the corresponding Figure Legend.

## Randomization

All samples were randomly allocated into experimental groups by randomly choosing pups from each litter to receive different treatments. Rats used in this study were randomly chosen from their litters to receive artificial CSF or hemoglobin injections to create the control and PHH conditions. Rats were also randomly chosen to receive 1.9 nm or 15 nm gold nanoparticle injection or Red Dextran injection. Rats were also

randomly chosen to receive intracisterna magna vs. intraventricular injection. Mice and zebrafish used in this study were also randomly chosen to receive tracer injections.

#### Blinding

Blinding was not performed for MRI image acquisition because imaging occurred shortly following the artificial CSF or hemoglobin injection, so the same experimenter performed injection and MRI acquisition. Experimental conditions were also evident from the MRI image data. Blinding was performed for all other parts of this study, including XRM image acquisition and post-processing, gold nanoparticle and other tracer injection, immunostaining, histology, tissue harvesting, all quantifications and analyses.

## Reporting for specific materials, systems and methods

We require information from authors about some types of materials, experimental systems and methods used in many studies. Here, indicate whether each material, system or method listed is relevant to your study. If you are not sure if a list item applies to your research, read the appropriate section before selecting a response.

### Materials & experimental systems

- |     |                                     |                               |
|-----|-------------------------------------|-------------------------------|
| n/a | <input type="checkbox"/>            | Involvement in the study      |
|     | <input checked="" type="checkbox"/> | Antibodies                    |
|     | <input checked="" type="checkbox"/> | Eukaryotic cell lines         |
|     | <input checked="" type="checkbox"/> | Palaeontology and archaeology |
|     | <input checked="" type="checkbox"/> | Animals and other organisms   |
|     | <input checked="" type="checkbox"/> | Clinical data                 |
|     | <input checked="" type="checkbox"/> | Dual use research of concern  |

### Methods

- |     |                                     |                          |
|-----|-------------------------------------|--------------------------|
| n/a | <input checked="" type="checkbox"/> | Involvement in the study |
|     | <input type="checkbox"/>            | ChIP-seq                 |
|     | <input checked="" type="checkbox"/> | Flow cytometry           |
|     | <input type="checkbox"/>            | MRI-based neuroimaging   |

## Antibodies

#### Antibodies used

The following primary antibodies were used for IHC on formalin-fixed paraffin-embedded tissues:

1. Rabbit monoclonal [EPR16590], anti-ChAT, Abcam, Cat# ab178850, 1:200 dilution, LOT: GR3230471-7
2. Rabbit monoclonal [EP1576Y], anti-S100 beta, Abcam, Cat# ab52642, 1:200 dilution, LOT: GR3215095-2
3. Mouse monoclonal, anti-GFAP-Cy3, Sigma-Aldrich, Cat# C9205, 1:200 dilution, LOT: 0000182455
4. Rabbit monoclonal [EPR12763], anti-NeuN, Abcam, Cat# 177487, 1:200 dilution, LOT: GR249899-42

The following secondary antibodies were used for IHC in formalin-fixed paraffin-embedded tissues:

5. Goat anti-Rabbit IgG (H+L) Cross-Absorbed Secondary Antibody, Alexa Fluor 594, Invitrogen, Cat# A-32740, 1:2000 dilution, LOT: 2201598
6. Goat anti-Rabbit IgG (H+L) Cross-Absorbed Secondary Antibody, Alexa Fluor 488, Invitrogen, Cat# A-11008, 1:2000 dilution, LOT: 2105157

#### Validation

Each antibody was validated by the manufacturer. The manufacturers for the corresponding antibodies are listed below:

1. [https://www.abcam.com/choline-acetyltransferase-antibody-epr16590-ab178850.html#description\\_references](https://www.abcam.com/choline-acetyltransferase-antibody-epr16590-ab178850.html#description_references)
2. [https://www.abcam.com/s100-beta-antibody-ep1576y-astrocyte-marker-ab52642.html#description\\_references](https://www.abcam.com/s100-beta-antibody-ep1576y-astrocyte-marker-ab52642.html#description_references)
3. [https://www.sigmaaldrich.com/US/en/product/sigma/c9205?gclid=CjwKCAiAheacBhB8EiwAltVO21L2p2j6lf3osdOCSE2tbfNq3ekHCCQEbpj60H5MMB\\_EpcGxjlrHvhoC9W8QAavD\\_BwE&gclid=aw.ds](https://www.sigmaaldrich.com/US/en/product/sigma/c9205?gclid=CjwKCAiAheacBhB8EiwAltVO21L2p2j6lf3osdOCSE2tbfNq3ekHCCQEbpj60H5MMB_EpcGxjlrHvhoC9W8QAavD_BwE&gclid=aw.ds)
4. <https://www.abcam.com/neu-antibody-epr12763-neuronal-marker-ab177487.html>
5. <https://www.thermofisher.com/antibody/product/Goat-anti-Rabbit-IgG-H-L-Highly-Cross-Adsorbed-Secondary-Antibody-Polyclonal/A32740>
6. <https://www.thermofisher.com/antibody/product/Goat-anti-Rabbit-IgG-H-L-Cross-Adsorbed-Secondary-Antibody-Polyclonal/A-11008>

The usage of these antibodies is described in full in the methods. Sections were soaked in xylene to remove paraffin, before hydration through descending grades of alcohol (100%, 95%, 70%, 50%, 30%) to DDW. Antigen retrieval was performed using a pH 6.0 citrate buffer (Sigma-Aldrich, St. Louis, MO) by microwaving in a 1:1000 solution in DDW for 30 minutes. Slides were cooled to room temperature, rinsed with PBS and blocked in 5% normal goat serum, 2.5% BSA, 0.5% TX-100 in PBS for one hour. Sections were incubated with appropriate dilutions of primary antibodies in PBS with 1% BSA and 0.5% TX-100 (TBST) overnight at 4°C. Sections were then rinsed in PBS 6 times for 5 minutes each followed by incubation for 90 minutes at room temperature with secondary antibody diluted in TBST. Sections were then rinsed in PBS 5-6 times for 5 minutes each at room temperature followed by incubation with DAPI reagent in a 1:500 dilution. After 5 minutes in DAPI, sections were washed in PBS 3 times for 5 minutes and mounted.

## Animals and other research organisms

Policy information about [studies involving animals](#); [ARRIVE guidelines](#) recommended for reporting animal research, and [Sex and Gender in Research](#)

#### Laboratory animals

Sprague Dawley Rats (Charles River Laboratories, Wilmington, MA) and C57BL/6J mice (The Jackson Laboratory, Bar Harbor, ME) were housed in a 12-hour light-dark cycle in a temperature and humidity-controlled room. Water and food were provided ad libitum. Rat and mouse pups were obtained from Charles River/Jackson Laboratories with their dams and housed at the animal facility with

their dams until P21. Zebrafish were bred in house.

Species: Rat; Strain: Sprague Dawley (Charles River Laboratories); Sex: male and female rats; Age: post-natal day 4-7.

Species: Mouse; Strain C57BL/6J (The Jackson Laboratory); Sex: male and female mice; Age: post-natal day 7-8.

Species: Zebrafish; Strain Casper line crossed to mitfa<sup>-/-</sup>Tg(HuC:EGFP); Sex: male and female; Age: 4-5 DPF.

Wild animals

This study did not involve wild animals.

Reporting on sex

Sex was not selected for over the duration of this study. Sex data was not collected for the XRM scans and as a result sex-based analyses were not conducted.

Field-collected samples

This study did not involve samples collected from the field.

Ethics oversight

All experiments were approved by the Washington University in St. Louis Institutional Animal Care and Use Committee (protocols #19-0905 and 19-1026).

Note that full information on the approval of the study protocol must also be provided in the manuscript.

## Magnetic resonance imaging

### Experimental design

Design type

1. Intraventricular gadolinium contrast (gadoterate meglumine, Gd-DOTA) to trace cerebrospinal fluid circulation  
2. Structural T2-weighted fast spin echo MRI to assess ventricle volumes 72 hours following aCSF or hemoglobin injection into the lateral ventricles

Design specifications

1. Each rat received a pre-contrast scan and a post-contrast scan.  
2. Each rat received one MRI scan. No rats underwent multiple or sequential scans.

Behavioral performance measures

N/A

### Acquisition

Imaging type(s)

1. Structural T1-weighted imaging  
2. Structural T2-weighted fast spin echo imaging

Field strength

1. 9.4T  
2. 4.7T

Sequence & imaging parameters

1. Repetition time 800/echo time 7.8195 mS, 4 averages, field of view 24.0 x 24.0 mm, matrix 256 x 256, 24 axial slices, 0.50mm thick, and 14 sagittal slices, 1.0mm thick.  
2. Repetition time 3000/echo time 27.50 mS, 3 averages, field of view was 18.0 mm x 18.0 mm, matrix 128 x 128, 24 axial slices, and 0.50 mm thick

Area of acquisition

Whole rat head

Diffusion MRI

Used

Not used

### Preprocessing

Preprocessing software

Paravision 360 3.2

Normalization

1. Each rat in the received a pre-contrast scan and was its own control.  
2. N/A

Normalization template

1. Each rat in the received a pre-contrast scan and was its own control.  
2. N/A

Noise and artifact removal

No noise and artifact removal was performed.

Volume censoring

No volume censoring was performed.

### Statistical modeling & inference

Model type and settings

1. Tracer diffusion  
2. Ventricle size after aCSF or Hb injection

Effect(s) tested

1. N/A  
2. Unpaired, two-tailed t-test (aCSF ventricle volume vs. Hb ventricle volume)

Specify type of analysis:

Whole brain

ROI-based

Both

Anatomical location(s) Statistic type for inference  
(See [Eklund et al. 2016](#))

Correction

## Models & analysis

- | n/a                                 | Included in the study                                                 |
|-------------------------------------|-----------------------------------------------------------------------|
| <input checked="" type="checkbox"/> | <input type="checkbox"/> Functional and/or effective connectivity     |
| <input checked="" type="checkbox"/> | <input type="checkbox"/> Graph analysis                               |
| <input checked="" type="checkbox"/> | <input type="checkbox"/> Multivariate modeling or predictive analysis |
